# Supplementary material for: Silk Fibroin as Edible Coating for Perishable Food Preservation
Source: PubMed Central journal article supplement (PMC4858704; doi:10.1038/srep25263), 2016-05-06
Supplement: srep25263-s1.pdf [file srep25263-s1.pdf]

Supporting Information

## **Silk Fibroin as Edible Coating for Perishable Food Preservation**

*Benedetto Marelli, Mark Brenckle, David L. Kaplan and Fiorenzo G. Omenetto\**

B. Marelli, M. Brenckle, D.L. Kaplan and F. G. Omenetto\*  
Department of Biomedical Engineering  
Tufts University  
4 Colby St., Medford, MA, 02155, USA  
E-mail: [Fiorenzo.Omenetto@tufts.edu](mailto:Fiorenzo.Omenetto@tufts.edu)

F. G. Omenetto  
Department of Physics  
Tufts University  
4 Colby St., Medford, MA 02155

Keywords: fruit, preservation, coating, silk, food

**Table S1** ICP-MS trace element analysis of water-based silk fibroin suspensions. Values are in part per million. ND=non detected.  $n=5$ . As comparison, toxicity threshold values for drinking water<sup>[1],[2]</sup> were reported in the fourth column of the table.

| <u>Element</u> | <u>Silk fibroin (2 wt%)</u> | <u>Detection Limit</u> | <u>Toxicity threshold in drinking water<sup>[1]</sup></u>                               |
|----------------|-----------------------------|------------------------|-----------------------------------------------------------------------------------------|
| Calcium        | 2.2±0.8                     | 0.3                    | 150                                                                                     |
| Chromium       | ND                          | 0.01                   | 0.05                                                                                    |
| Copper         | 0.013±0.03                  | 0.002                  | 2                                                                                       |
| Gold           | ND                          | 0.002                  | Not regulated. Generally considered non toxic                                           |
| Iron           | 0.07±0.02                   | 0.05                   | 2 (suggested value <sup>[2]</sup> )                                                     |
| Lead           | ND                          | 0.002                  | 0.01                                                                                    |
| Lithium        | 0.387±0.09                  | 0.006                  | 5 (Not regulated by WHO. Suggested value <sup>[2]</sup> )                               |
| Magnesium      | 0.16±0.01                   | 0.06                   | 150                                                                                     |
| Manganese      | ND                          | 0.002                  | 0.4                                                                                     |
| Nickel         | 0.006±0.001                 | 0.002                  | 0.07                                                                                    |
| Potassium      | 1.8±0.1                     | 0.5                    | 12 (Not regulated by WHO. Suggested value <sup>[2]</sup> )                              |
| Silver         | ND                          | 0.002                  | 0.002                                                                                   |
| Sodium         | 113.5±0.5                   | 0.5                    | 200 (Not regulated by WHO. Suggested value for taste)                                   |
| Tin            | ND                          | 0.002                  | 1000 (Not regulated by WHO. Suggested value <sup>[2]</sup> as not absorbed by the body) |
| Zinc           | 0.05±2                      | 0.03                   | 5                                                                                       |

**Table S2** Calculated diffusion coefficients for water mass transport experiments.  $k$  and  $n$  are fitting parameters while  $D$  is the diffusion coefficient.

| Silk fibroin beta-sheet content | $k$          | $n$         | $D$ (cm <sup>2</sup> /s) |
|---------------------------------|--------------|-------------|--------------------------|
| 36%                             | 0.25 ± 0.048 | 0.42 ± 0.04 | 5.79 x 10 <sup>-6</sup>  |
| 48%                             | 0.19 ± 0.039 | 0.48 ± 0.03 | 3.21 x 10 <sup>-6</sup>  |
| 58%                             | 0.16± 0.027  | 0.55 ± 0.02 | 1.05 x 10 <sup>-6</sup>  |

**Table S3** Calculated effective silk fibroin O<sub>2</sub> diffusion coefficient for gas transport experiments.

| Silk fibroin beta-sheet content | Film thickness<br>$\mu\text{m}$ | Effective membrane O <sub>2</sub> diffusion coefficient [ $D_{e,M}$ ] (steady state)<br>$10^{-11} \cdot (\text{cm}^2/\text{s})$ |
|---------------------------------|---------------------------------|---------------------------------------------------------------------------------------------------------------------------------|
| 23%                             | 81±4                            | 83.9±7.2                                                                                                                        |
| 36%                             | 78±3                            | 67.9±3.5                                                                                                                        |
| 48%                             | 76±4                            | 5.5±1.4                                                                                                                         |
| 58%                             | 73±2                            | 1.9±0.3                                                                                                                         |

**Figure S1**

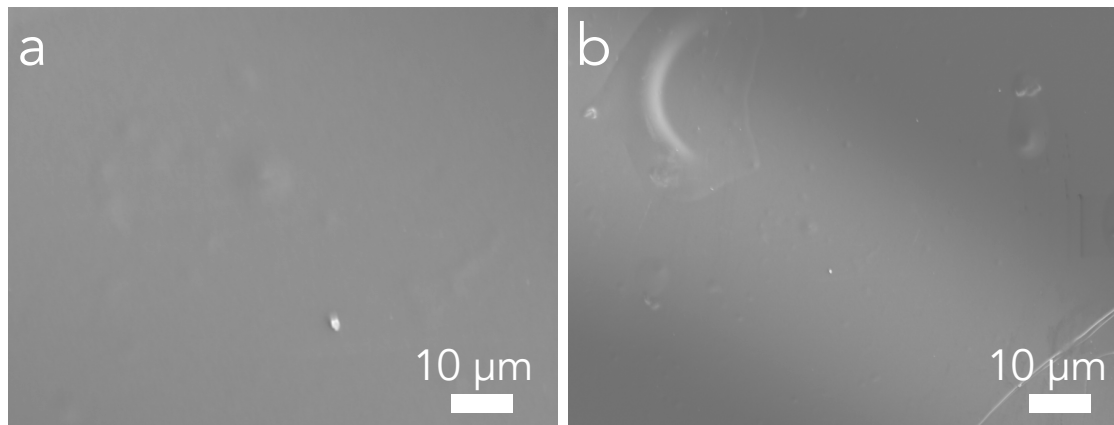

**Figure S1.** Scanning electron microscopy of silk fibroin membranes a) with 23% beta-sheet structures (i.e. before water annealing process and b) with 58% beta-sheets structures (i.e. at 12 hours of water annealing). The micrographs depict no changes in the morphology of the membranes at the microscale.

**Figure S2**

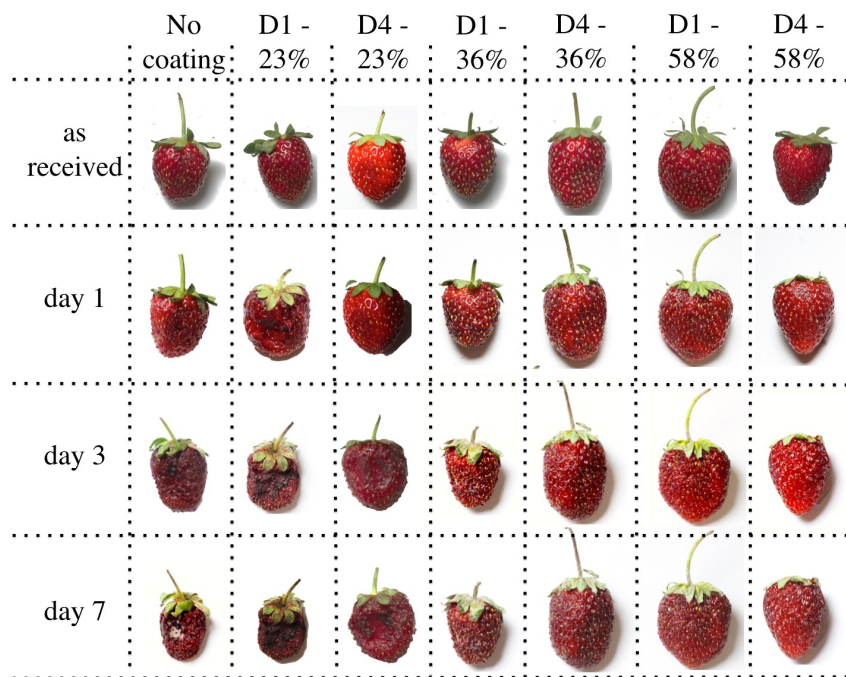

**Figure S2. Time-lapse of strawberries ripening.** Berries were stored at 22°C and 38% RH as received (*no coating*) and after coating with silk fibroin suspension ( $Dx-xx\%$ ).  $Dx$  stands for ‘x’ dip coating steps.  $xx\%$  stands for relative content of beta-sheets structures in the silk coating. The

amount of beta-sheets was modulated by varying the exposure time to water annealing process. Thus, D1-58% refers to strawberries that were dip coated 1 time in silk fibroin solution and that were exposed to a water annealing process that yielded 58% of beta-sheets in the protein structure.

### **Reference**

- [1] FAO. Global food losses and food waste. (2011) Available at <http://www.fao.org/docrep/014/mb060e/mb060e.pdf> (Accessed: 8th March 2016).
- [2] J. DeZuane, in *Handbook of Drinking Water Quality*, Wiley, 49-147 (John Wiley & Sons, Inc., 1997).
